- plaques on the transmural perfusion gradient: a [ $^{15}\text{O}$ ]H $_2\text{O}$  PET study. *Eur Heart J* 2014;**35**:2094–105.
14. Cerqueira MD, Weissman NJ, Dilsizian V, Jacobs AK, Kaul S, Laskey WK et al. Standardized myocardial segmentation and nomenclature for tomographic imaging of the heart. A statement for healthcare professionals from the Cardiac Imaging Committee of the Council on Clinical Cardiology of the American Heart Association. *Circulation* 2002;**105**:539–42.
  15. Danad I, Uusitalo V, Kero T, Saraste A, Rajmakers PG, Lammertsma AA et al. Quantitative assessment of myocardial perfusion in the detection of significant coronary artery disease: cutoff values and diagnostic accuracy of quantitative [ $^{15}\text{O}$ ]H $_2\text{O}$  PET imaging. *J Am Coll Cardiol* 2014;**64**:1464–75.
  16. Neumann FJ, Sousa-Uva M, Ahlsson A, Alfonso F, Banning AP, Benedetto U et al. 2018 ESC/EACTS Guidelines on myocardial revascularization. *Eur Heart J* 2019; **40**:87–165.
  17. Heagerty PJ, Lumley T, Pepe MS. Time-dependent ROC curves for censored survival data and a diagnostic marker. *Biometrics* 2000;**56**:337–44.
  18. Dorbala S, Di Carli MF, Beanlands RS, Merhige ME, Williams BA, Veledar E et al. Prognostic value of stress myocardial perfusion positron emission tomography: results from a multicenter observational registry. *J Am Coll Cardiol* 2013;**61**: 176–84.
  19. Juarez-Orozco LE, Tio RA, Alexanderson E, Dweck M, Vliegenthart R, El Moumni M et al. Quantitative myocardial perfusion evaluation with positron emission tomography and the risk of cardiovascular events in patients with coronary artery disease: a systematic review of prognostic studies. *Eur Heart J Cardiovasc Imaging* 2018;**19**:1179–87.
  20. Maaniitty T, Stenstrom I, Bax JJ, Uusitalo V, Ukkonen H, Kajander S et al. Prognostic value of coronary CT angiography with selective PET perfusion imaging in coronary artery disease. *JACC Cardiovasc Imaging* 2017;**10**: 1361–70.
  21. Joutsiniemi E, Saraste A, Pietila M, Maki M, Kajander S, Ukkonen H et al. Absolute flow or myocardial flow reserve for the detection of significant coronary artery disease? *Eur Heart J Cardiovasc Imaging* 2014;**15**:659–65.

## IMAGE FOCUS

doi:10.1093/ehjci/jeaa029

Online publish-ahead-of-print 6 March 2020

# Varicose cardiac veins in a case of persistent left superior vena cava and stenosis of the coronary sinus ostium

Stephanie Löbig <sup>1\*</sup>, Andreas Seitz<sup>1</sup>, Markus Feuerstein<sup>2</sup>, Raffi Bekerredjian<sup>1</sup>, and Heiko Mahrholdt<sup>1</sup>

<sup>1</sup>Department of Cardiology, Robert-Bosch-Krankenhaus, Auerbachstr. 110, 70376, Stuttgart, Germany; and <sup>2</sup>Department of Radiology, Robert-Bosch-Krankenhaus, Auerbachstr. 110, 70376, Stuttgart, Germany

\* Corresponding author. Tel: +49 711 8101 6048; Fax: +49 711 8101 3795. E-mail: stephanie.loebig@rbk.de

A 53-year-old asymptomatic male patient was referred to our hospital with nonspecific electrocardiogram-changes (insignificant ST-depression in leads V4–V6) to exclude obstructive coronary artery disease. Myocardial ischaemia and scarring could be ruled-out by adenosine stress cardiac magnetic resonance imaging, but a dilatation of the middle posterior cardiac vein as well as the coronary sinus (CS) were noticed incidentally (Panel A, arrow points to dilated CS; Panel B, arrow points to dilated middle posterior vein).

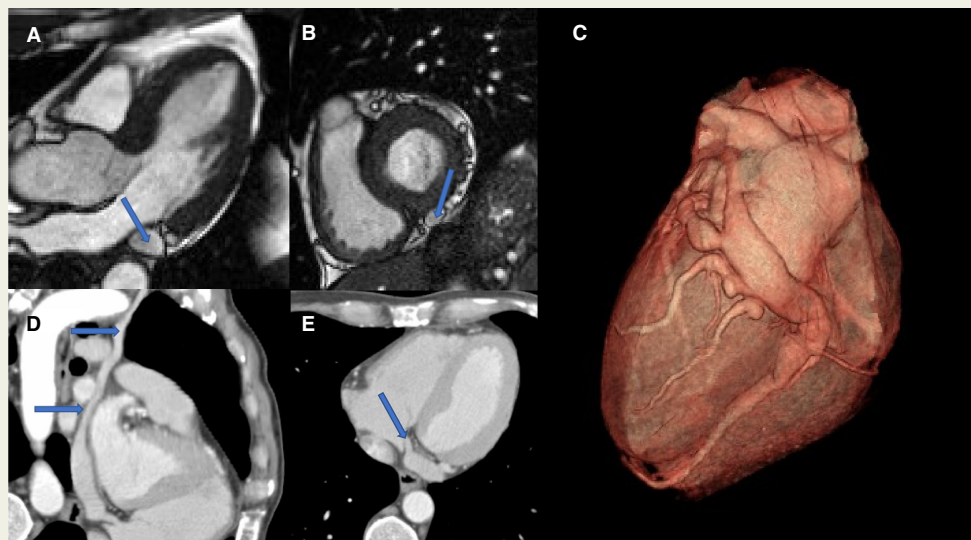

We therefore performed consecutive cardiac computed tomography which revealed extensively varicose cardiac veins (Panel C; [Supplementary data online, Video S1](#)) and persistence of the left superior vena cava (PLSVC) (Panel D). While the maximum diameter of the CS was 15 mm, the CS ostium showed some degree of stenosis (diameter 4 mm × 3 mm) (Panel E, arrow points at stenotic CS ostium).

PLSVC is estimated to be present in about 0.3% of the general population, usually causing some degree of CS dilatation. As long as the PLSVC drains into a roofed CS, it does not cause any short circuit. In our case, the PLSVC originates from the left subclavian vein and drains into the CS. Anyhow, the presence of an PLSVC alone would not explain the extensively dilated coronary veins. Our patient also showed a stenotic CS ostium, which we think together with the PLSVC causes reperfusion on the coronary veins and therefore causes their varicose appearance.

[Supplementary data](#) are available at *European Heart Journal - Cardiovascular Imaging* online.
